# Supplementary material
Source: Royal Society of Chemistry journal article supplement (doi:10.1039/d6qm00155f)
Supplement: d6qm00155f1.pdf [file d6qm00155f1.pdf]

## SUPPORTING INFORMATION

# One-Pot Postsynthetic Linkage Modification of Imine Covalent Organic Frameworks via Iminium Activation

Chonglu Wang<sup>1#</sup>, Tian Wang<sup>1#</sup>, Shuqi Jiang<sup>1#</sup>, Mengmeng Jia<sup>1</sup>, Yaqi Wei<sup>1</sup>, Yin-Shan Meng<sup>1,3</sup>, Jiyun Hu<sup>2\*</sup>, Tao Liu<sup>1,3\*</sup>

<sup>1</sup> State Key Laboratory of Fine Chemicals, Frontier Science Center for Smart Materials, School of Chemical Engineering, Dalian University of Technology, No. 2 Linggong Road, Dalian 116024, China.

<sup>2</sup> Dongguan Key Laboratory of Interdisciplinary Science for Advanced Materials and Large-Scale Scientific Facilities, School of Physical Sciences, Great Bay University, Dongguan 523000, China.

<sup>3</sup> Liaoning Binhai Laboratory, Dalian 116023, China.

#These authors contribute equally to this work.

\*Corresponding Author(s): Tao Liu: [liutao@dlut.edu.cn](mailto:liutao@dlut.edu.cn); Jiyun Hu: [hujiyun@gbu.edu.cn](mailto:hujiyun@gbu.edu.cn).

## SUPPORTING INFORMATION

### Table of Contents

|                                                                                                                         |    |
|-------------------------------------------------------------------------------------------------------------------------|----|
| 1. Instrumentation .....                                                                                                | 3  |
| 2. Chemicals .....                                                                                                      | 3  |
| 3. Synthesis and characterization of COFs.....                                                                          | 4  |
| 3.1 Acetic acid catalyzed reduction of <i>N</i> -benzylidenaniline to <i>N</i> -benzylaniline with Hantzsch ester ..... | 4  |
| 3.2 Synthesis of COF linkers .....                                                                                      | 4  |
| 3.2.1 Synthesis of 3,3',5,5'-tetra( <i>p</i> -aminophenyl)-bimesitylene (BMTA).....                                     | 4  |
| 3.2.2 Synthesis of hexaformylphenylbenzene (HFPB) .....                                                                 | 5  |
| 3.3 Synthesis of reduced COFs with HEH .....                                                                            | 6  |
| 4. Electrochemical Impedance Spectroscopy .....                                                                         | 10 |
| 5. Supporting figures .....                                                                                             | 11 |
| 6. References.....                                                                                                      | 19 |

## SUPPORTING INFORMATION

### 1. Instrumentation

**Powder X-ray diffraction (PXRD)** patterns were collected on a SmartLab 9KW desktop X-Ray diffractometer operated at 30 kV and 15 mA (step = 0.01°, scan rate = 2 °/min).

**FT-IR** spectra were recorded on a PerkinElmer Frontier FT-IR spectrometer.

**Liquid NMR experiment** were carried out on an Varian DLG400 (400 Hz).

**Solid State NMR experiments** were carried out on an Bruker AVANCE III HD 600 MHz with a 3.2 mm HCN Balun probe with samples spinning at 10 kHz.

**X-ray photoelectron spectroscopy (XPS)** studies were performed with a ESCALAB Xi+ XPS instrument.

**Scanning Electron Microscopy (SEM)** images were recorded with an SU88220 scanning electron microscope.

**Field Emission Transmission Electron Microscope (TEM)** images were recorded with an JEM-F200 transmission electron microscope.

**N<sub>2</sub> sorption isotherms** were obtained on a Autosorb-IQ-MP/XR Automated Gas Sorption Analyzer at 77 K. All the samples were vacuum activated at 120 °C overnight on the instrument before analysis.

### 2. Chemicals

1,4-dioxane, *o*-dichlorobenzene (DCB), *n*-Butanol, mesitylene, and *N,N*-dimethylformamide (DMF) were purchased from Energy Chemical. 4-aminophenylboronic acid pinacol ester, (4-formylphenyl)boronic acid, tetrakis(triphenylphosphine)palladium, and 1,4-dihydro-2,6-dimethyl-3,5-pyridinedicarboxylate (HEH) (97%) were obtained from Adamas. All the chemicals were used as received.

## SUPPORTING INFORMATION

### 3. Synthesis and characterization of COFs

#### 3.1 Acetic acid catalyzed reduction of *N*-benzylideneaniline to *N*-benzylaniline with Hantzsch ester

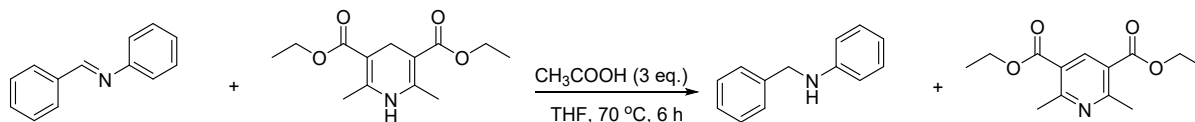

*N*-benzylideneaniline (18.1 mg, 0.1 mmol), HEH (26.6 mg, 0.1 mmol), and acetic acid (17.2  $\mu$ L, 0.3 mmol) were mixed in 1 mL THF in a one-dram vial. The vial was heated at 70  $^{\circ}$ C on an aluminum block for 6 hours. After then, the solvent was removed, and the residual organic compounds were dissolved in  $\text{CDCl}_3$  and analyzed by  $^1\text{H}$  NMR spectroscopy and GC/MS. Spectroscopic data of *N*-benzylaniline:  $^1\text{H}$  NMR (400 MHz,  $\text{CDCl}_3$ ):  $\delta$  = 7.42-7.30 (m, 5H), 7.19 (t,  $J$  = 7.79 Hz, 2H), 6.73 (t,  $J$  = 7.25 Hz, 1H), 6.68 (d,  $J$  = 7.35 Hz, 2H), 4.36 (s, 2H), 4.08 (br, 1H).  $^{13}\text{C}$  NMR (101 MHz,  $\text{CDCl}_3$ )  $\delta$  148.17, 139.46, 129.29, 128.66, 127.54, 127.26, 117.61, 112.89, 48.37.

#### 3.2 Synthesis of COF linkers

##### 3.2.1 Synthesis of 3,3',5,5'-tetra(*p*-aminophenyl)-bimesitylene (BMTA)<sup>[1]</sup>

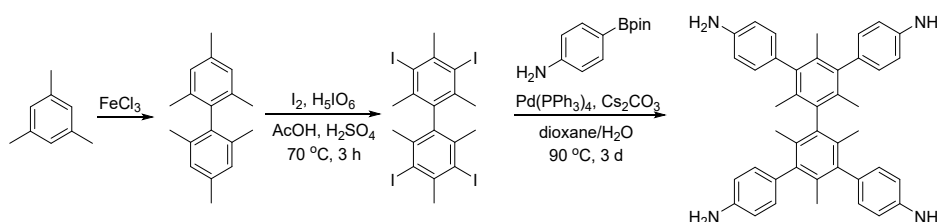

**Bimesityl.**  $\text{FeCl}_3$  (80.00 g) was added in small portions into 180 mL mesitylene under Ar flow (**Caution: gas generation!**). After stirring at room temperature for 4 h, the mixture was poured onto ice and filtered. The organic phase was separated and dried over anhydrous sodium sulfate. Mesitylene was removed by vacuum distillation. The remaining solid was recrystallized from acetone to give a white solid. Yield: 20.00 g, 19%.  $^1\text{H}$  NMR (400 MHz,  $\text{CDCl}_3$ ):  $\delta$  = 6.93 (s, 2H); 2.29 (s, 3H); 1.87 (s, 6H).

**3,3',5,5'-tetraiodo-bimesityl.** Bimesityl (2.00 g, 18.39 mmol), iodine (4.26 g, 16.77 mmol),  $\text{H}_5\text{IO}_6$  (1.91 g, 8.4 mmol), concentrated sulfuric acid (6 mL), and acetic acid (120 mL) were heated at 70  $^{\circ}$ C in an argon for 3 h. After cooled to room temperature, the reaction mixture was poured into ice water containing sodium thiosulfate. The aqueous solution was extracted with dichloromethane and the combined organic phase was evaporated to give a white solid. Yield: 3.30 g, 24%  $^1\text{H}$  NMR (400 MHz,  $\text{CDCl}_3$ ):  $\delta$  = 3.04 (s, 6H); 2.08 (s, 12H).

**3,3',5,5'-tetra(*p*-aminophenyl)-bimesitylene.** 3,3',5,5'-tetraiodo-bimesityl (1.40 g, 1.9 mmol), 4-aminophenylboronic acid pinacol ester (3.30 g, 15.2 mmol),  $\text{Pd}(\text{PPh}_3)_4$  (0.20 g, 0.2 mmol), and  $\text{Cs}_2\text{CO}_3$  (4.90 g, 15.0 mmol) were loaded into a 250 mL flask under Ar. Degassed dioxane/ $\text{H}_2\text{O}$  (80 mL/8 mL) were added and the mixture were heated at 90  $^{\circ}$ C for 3 days. After cooled to room temperature, the reaction mixture was diluted with water and extracted with dichloromethane. The combined organic solvent was removed under vacuum. Purification was performed on column chromatography (ethyl acetate/*n*-hexane =1/1) to give a light-yellow solid

## SUPPORTING INFORMATION

Yield: 0.23 g, 20%.  $^1\text{H NMR}$  (400 MHz,  $\text{CDCl}_3$ ):  $\delta$  = 6.96 (d,  $J=8.0$  Hz, 8H), 6.73 (d,  $J=8.0$  Hz, 8H), 4.13 (s, 8H), 1.75 (s, 6H), 1.67 (s, 12H).

### 3.2.2 Synthesis of hexaformylphenylbenzene (HFPB)<sup>[2]</sup>

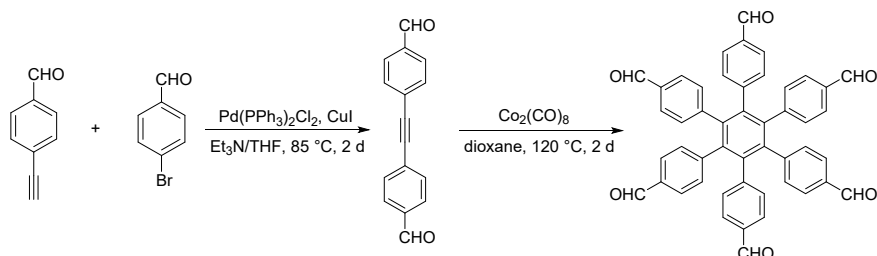

**4,4'-(ethyne-1,2-diyl)dibenzaldehyde.** A 250 mL two-neck flask was charged with p-acetylene benzaldehyde (2.00 g, 15.37 mmol), p-bromobenzaldehyde (2.84 g, 15.37 mmol),  $\text{Pd}(\text{PPh}_3)_2\text{Cl}_2$  (539.4 mg, 0.77 mmol), and  $\text{CuI}$  (293.3 mg, 1.54 mmol) under Ar. Degassed THF (100 mL) and  $\text{NEt}_3$  (3.12 g, 30.74 mmol) were then added via syringe. The mixture was heated at  $85^\circ\text{C}$  for 2 days. After cooling to room temperature, the solvent was removed under vacuum. The resulting solid was washed with methanol, ether and a small amount of dichloromethane to give yellow solid. Yield: 1.52 g, 43%.  $^1\text{H NMR}$  (400 MHz,  $\text{CDCl}_3$ )  $\delta$  = 10.04 (s, 2H), 7.90 (d,  $J = 8.3$  Hz, 4H), 7.71 (d,  $J = 8.3$  Hz, 4H).

**Hexaformylphenylbenzene.** 4,4'-(ethyne-1,2-diyl)dibenzaldehyde (1.52 g, 6.5 mmol) and dicobalt octacarbonyl (100 mg, 0.29 mmol) were refluxed in 80 mL dry dioxane under Ar for 2 days. After cooling to room temperature, diluted hydrochloric acid was added. The solvent was removed under reduced pressure, and the resulting residue was washed with methanol to give a white solid. Yield: 0.35 g, 42%.  $^1\text{H NMR}$  (400 MHz,  $\text{DMSO}-d_6$ )  $\delta$  = 9.73 (s, 6H), 7.46 (d,  $J = 8.1$  Hz, 12H), 7.21 (d,  $J = 8.1$  Hz, 12H).

## SUPPORTING INFORMATION

### 3.3 Synthesis of reduced COFs with HEH

#### pts-R COF.<sup>[3]</sup>

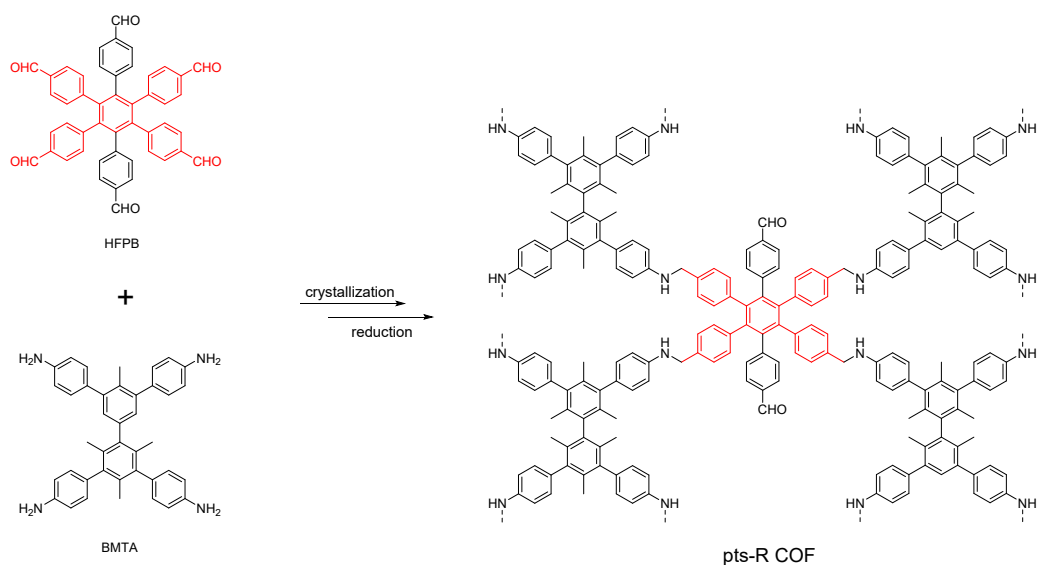

**Hantzsch ester as the reducing agent.** BMTA (18.1 mg, 0.03 mmol), HFPB (21.1 mg, 0.3 mmol), *o*-dichlorobenzene (0.8 mL), butyl alcohol (0.8 mL) were added into a 10 mL Schlenk tube. After sonication for 5 min, 0.3 mL of 6 M AcOH was added. The tube was sealed and degassed by three freeze-pump-thaw cycles. The mixture was then heated at 120 °C for 72 h. After the reaction was cooled down, Hantzsch ester (60.79 mg, 0.24 mmol, 2.0 equiv. to imine) was added to the mixture and well mixed with the COF suspension. The mixture was heated at 120 °C for 24 h. The powder was filtered and washed thoroughly with THF, acetone, and *n*-Hexane and then dried at 60 °C in a vacuum overnight. Yield: 25.2 mg.

**HCOOH as the reducing agent.** To a suspension of pts COF (30.0 mg) in *o*-dichlorobenzene (0.8 mL), butyl alcohol (0.8 mL) was added formic acid (36.7  $\mu$ L). The suspension was heated at 120 for 24 h. The powder was filtered and washed thoroughly with THF, acetone, and *n*-Hexane and then dried at 60 °C in a vacuum overnight. Yield: 18.0 mg.

**NaBH<sub>4</sub> as the reducing agent.** pts COF (30.0 mg) was placed in a 10 mL beaker, and 5 mL methanol was added with stirring. The mixture was cooled to 0 °C, followed by the portionwise addition of NaBH<sub>4</sub> (37.83 mg, 0.768 mmol, 8 eq. to imine) within 1 h. The reaction mixture was stirred at 0 °C for 1 h and then at room temperature overnight. The powder was filtered and washed thoroughly with H<sub>2</sub>O, acetone, and EtOH then dried at 60 °C in vacuum overnight. Yield: 19.5 mg.

## SUPPORTING INFORMATION

### TAPB-DMTA-R COF.

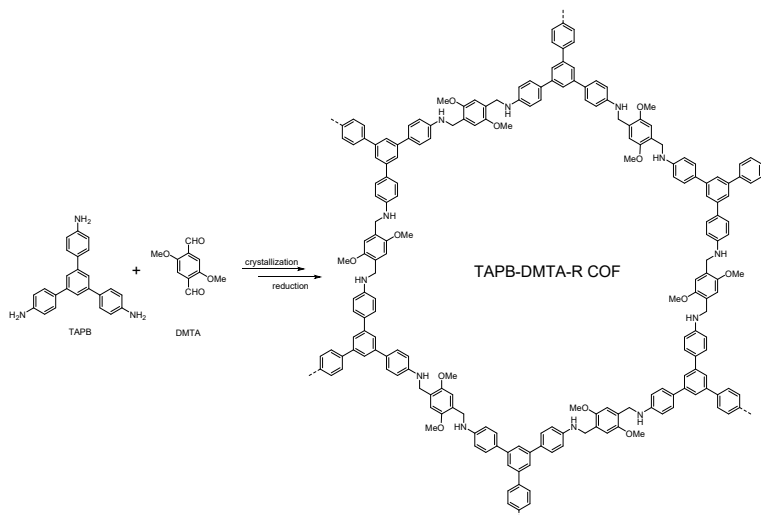

**Using AcOH as a catalyst.**<sup>[4]</sup> TAPB (33.5 mg, 0.0954 mmol) and DMTA (27.8 mg, 0.143 mmol) were weighed into a 4 mL vial. 1.0 mL of 4/1 p-dioxane/mesitylene was added to the vial, which was sonicated thoroughly (1-2 minutes). The vial was preheated to 70 °C using an aluminum heating block. To the preheated solution, 0.5 mL of 10.5 M acetic acid was added. The vial was capped securely, then gently swirled to mix the acid into the reaction mixture, then the reaction mixture was allowed to stand for 4 hours at 70 °C. After the specified reaction time, HEH (128 mg, 0.48 mmol, 2 equiv. to imine) was added to the mixture. Then the vial was capped and heated at 100 °C for 12 h. The precipitate was collected by filtration and washed with tetrahydrofuran (THF) and methanol. The powder was dried at 60 °C under vacuum overnight. Yield: 40 mg.

**Using Sc(OTf)<sub>3</sub> as a catalyst.**<sup>[5]</sup> 2,5-dimethoxyterephthalaldehyde (DMTA, 17.3 mg, 0.089 mmol) and dichloromethane (1 mL) were placed in a Biotage 20 mL high precision glass vial and sonicated for 10 s. Acetonitrile (27 mL) was added into the vial, and the resulting solution was stirred at room temperature until DMTA was dissolved. Then 1,3,5-tris(4-aminophenyl)benzene (TAPB, 20.9 mg, 0.059 mmol) was added in the vial. The vial was sealed with a cap and stirred at room temperature. Sc(OTf)<sub>3</sub> (7 mg, 0.0142 mmol), 0.08 equivalent per amine functional group in TAPB, was dissolved in 2 mL acetonitrile and injected in the reaction tube within 5 min. The reaction was stirred at room temperature for 20 hours. After the specified reaction time, HEH (90 mg, 0.354 mmol, 2 equiv. to imine) was added to the mixture. Then the vial was capped and heated at 60 °C for 12 h. The precipitate was collected by filtration and washed with tetrahydrofuran (THF) and methanol. The powder was dried at 60 °C under vacuum overnight. Yield: 30 mg.

**Using Fe(NO<sub>3</sub>)<sub>3</sub>·9H<sub>2</sub>O as a catalyst.**<sup>[6]</sup> TAPB (20.9 mg, 0.059 mmol) and DMTA (17.3 mg, 0.089 mmol) were weighed and dissolved in a mixture of 1 mL DCB and 1 mL n-Butanol in a 4 mL glass vial directly. The vial was sonicated for a while until all particles dissolved in the solvents. Then Fe(NO<sub>3</sub>)<sub>3</sub>·9H<sub>2</sub>O (5 mol%, 3.6 mg, 0.089 mmol) was added. The vial was sonicated again for a while and placed still for 2 hours. After the specified reaction time, HEH (90 mg, 0.354 mmol, 2 equiv. to imine) was added to the mixture. Then the vial was capped and heated at 60 °C for 12 h. The precipitate was collected by filtration and washed with tetrahydrofuran (THF) and methanol. The powder was dried at 60 °C under vacuum overnight. Yield: 25 mg.

**Using Sbl3 as a catalyst.**<sup>[7]</sup> TAPB (16.0 mg, 0.045 mmol) and DMTA (13.2 mg, 0.067 mmol) were dissolved in DMSO (1 mL) in a 4 mL vial. The precursor solution was sonicated to guarantee a well dispersion before adding 25 μL Sbl3 stock solution (46.1 mg/mL). The vial was then capped and heated at 90 °C for 24 h. After cooling down to room temperature, Hantzsch ester (51 mg, 0.20 mmol, 1.5 equiv. to imine) was added into the vial and

## SUPPORTING INFORMATION

well mixed. The vial was heated at 50 °C for 12 h. The product was filtered and washed with DMSO, THF, and methanol. The solid was dried at 60 °C under vacuum overnight. Yield: 17 mg.

### Py-Py-R COF.<sup>[8]</sup>

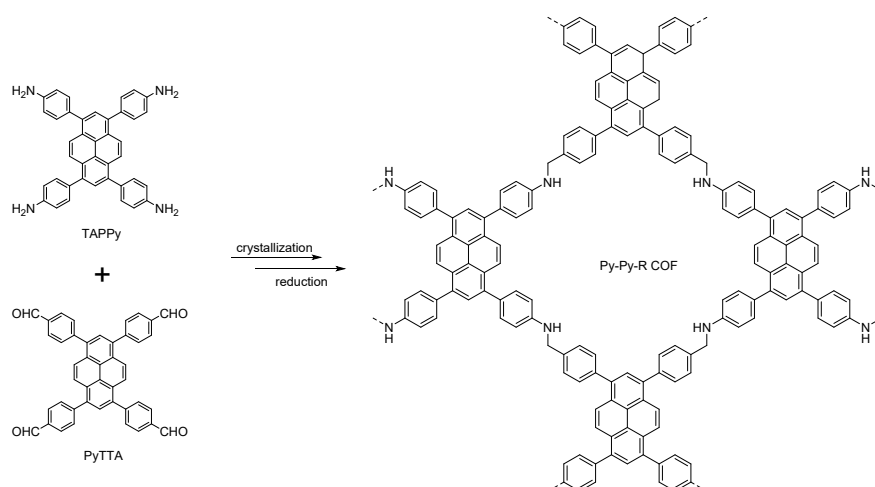

**Py-Py-R COF.** TAPPy (56.8 mg, 0.10 mmol), PyTTA (62.0 mg, 0.1 mmol), mesitylene (1.0 mL), dioxane (1.0 mL), and DMA (0.7 mL) were added into a 10 mL Schlenk tube. After sonication for 5 min, 0.1 mL of 3 M AcOH were added. The tube was sealed and degassed by three freeze-pump-thaw cycles. The mixture was then heated at 140 °C for 72 h. After the reaction was cooled down, Hantzsch ester (303.95 mg, 1.2 mmol, 3.0 equiv. to imine) was added into the mixture and well mixed with the COF suspension. The mixture was heated at 120 °C for 24 h. The powder was filtered and washed thoroughly with THF and acetone and then dried at 60 °C in a vacuum overnight. Yield: 88 mg.

**H<sub>3</sub>PO<sub>4</sub>@Py-Py-R COF.** Phosphoric acid (100 mg) was dissolved in anhydrous tetrahydrofuran (THF, 4 mL) to form a homogeneous solution. This solution was introduced into samples of Py-Py COF (40 mg), which had been pre-dried under vacuum at 120 °C overnight. The resulting mixture was stirred at room temperature for 3 h. The THF was then slowly removed by evaporation under vacuum at 70 °C over a period of 6 hours. Subsequently, the vials were placed in an oven at 70 °C for 12 h. This afforded H<sub>3</sub>PO<sub>4</sub>@Py-Py-R COF quantitatively.

### COF-303-R.

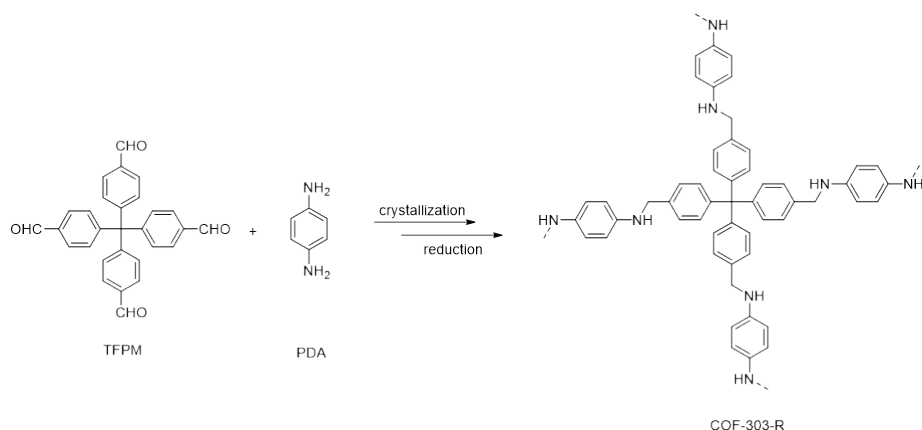

**Synthesis of reduced COF-303-R:** TFPM (21.6 mg, 0.05 mmol), phenylenediamine (10.8 mg, 0.10 mmol), and 1,4-dioxane (1 mL) were loaded into a 10 mL Schlenk tube. The mixture was sonicated before 0.2 mL of 6 M

## SUPPORTING INFORMATION

AcOH was added. The tube was sealed and degassed by three freeze-pump-thaw cycles. The mixture was then heated at 120 °C for 72 h. After the reaction was cooled down, Hantzsch ester (50.7 mg, 0.20 mmol, 1 equiv. to imine) was added to the mixture and well mixed with the COF suspension. The mixture was heated at 120 °C for 6 h. The powder was filtered and washed thoroughly with methanol, THF, and chloroform and then dried at 60 °C in a vacuum overnight. Yield: 25.0 mg.

## SUPPORTING INFORMATION

### 4. Electrochemical impedance spectroscopy

Approximately 40 mg of the sample was weighed, ground into fine powder, and loaded into a custom-made mold. The powder was pressed into a pellet using a tablet press under a pressure of 6–8 MPa for 10 min. The thickness ( $l$ , unit: cm) and diameter ( $d$ , unit: cm) of the pellet were accurately measured and recorded with a vernier caliper. Conductive silver paste was applied to both bottom surfaces of the pellet, and copper wires with a diameter of 0.2 mm (the enamel coating at both ends of the wires was scraped off with a blade in advance) were led out from both sides. During the application of the silver paste, it was ensured that the conductive silver paste did not seep into the side surfaces of the pellet. Subsequently, the prepared pellet was fixed between two dry glass slides, placed in a desiccator for 24 h of drying, and then transferred to a constant temperature and humidity chamber for temperature and humidity control, with a stabilization time of 1 h for the variable-temperature tests. Finally, the copper wires led out from both ends of the pellet were connected to the two electrodes of an electrochemical workstation for testing.

# SUPPORTING INFORMATION

## 5. Supporting figures

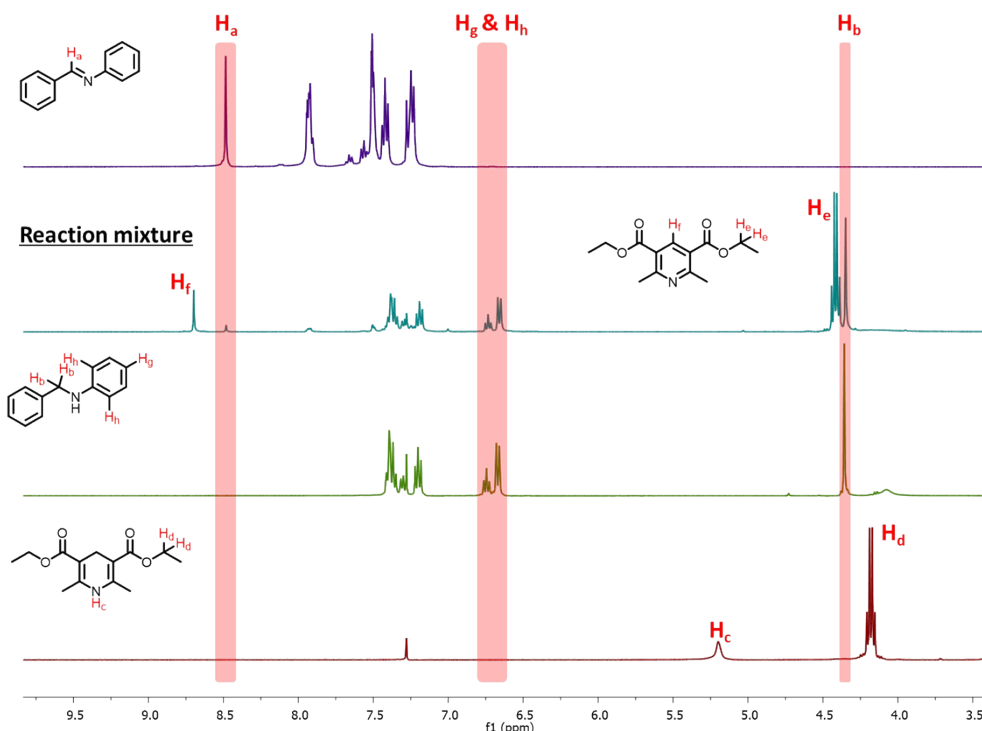

**Figure S1.** <sup>1</sup>H NMR spectra of *N*-benzylideneaniline (purple line), the model reduction reaction mixture (cyano line), *N*-Benzylaniline (green line), and Hantzsch ester (maroon line) in CDCl<sub>3</sub>.

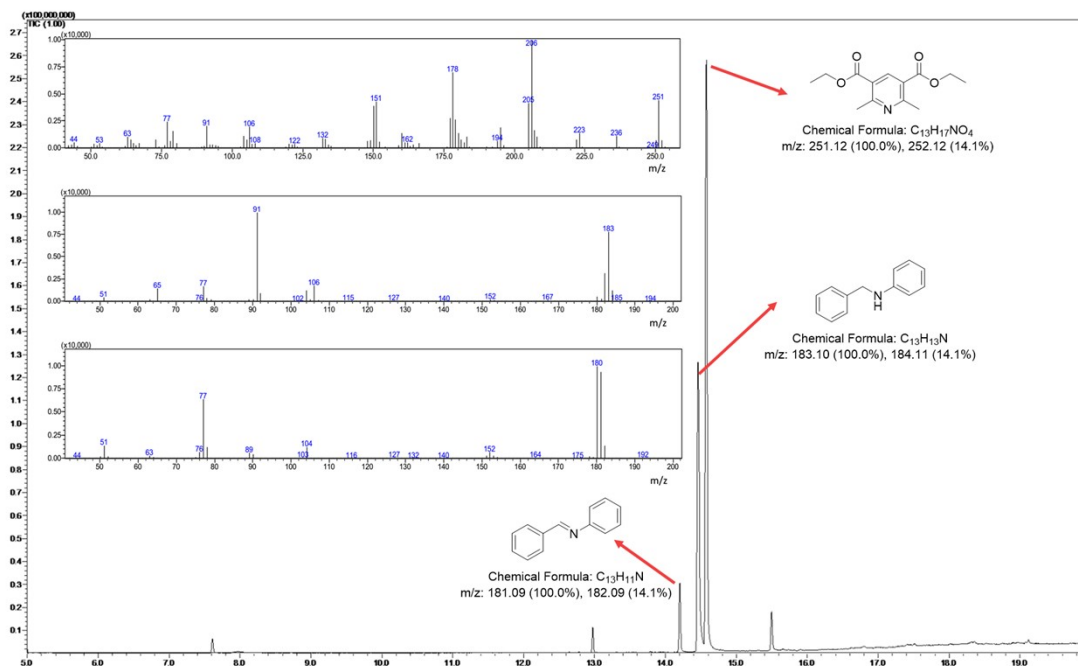

**Figure S2.** GC Chromatogram of the model reduction reaction mixture (inset shows the corresponding EI mass spectra).

## SUPPORTING INFORMATION

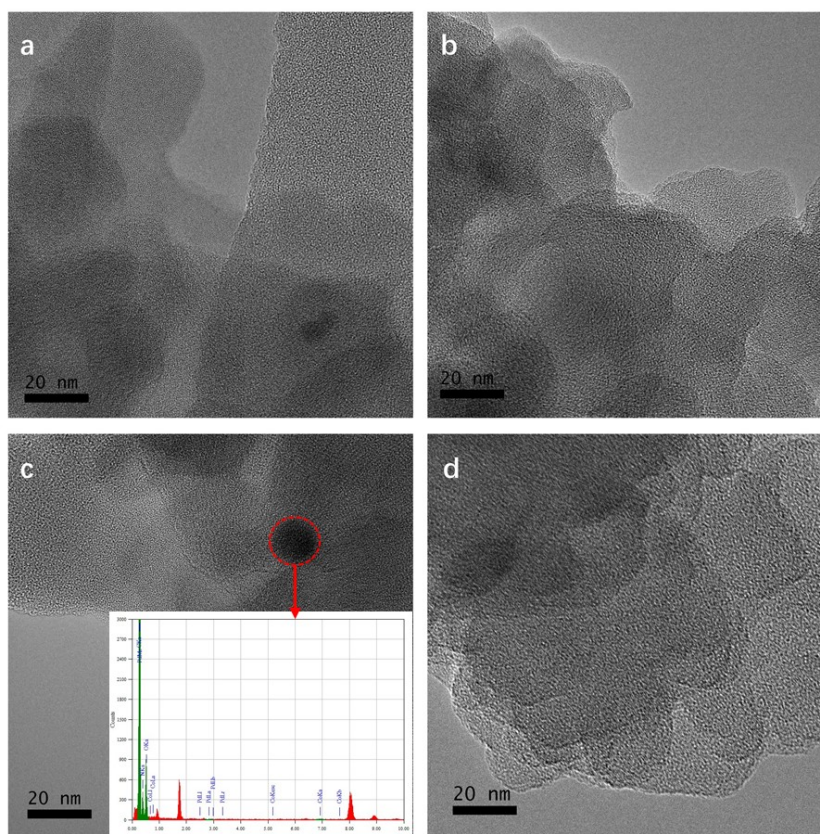

**Figure S3.** TEM image of (a) pts, (b) pts-R<sub>HEH</sub>, (c) pts-R<sub>HCOOH</sub>, (d) pts-R<sub>NaBH<sub>4</sub></sub> (the inset in c shows the EDX spectrum of Pd nanoparticle).

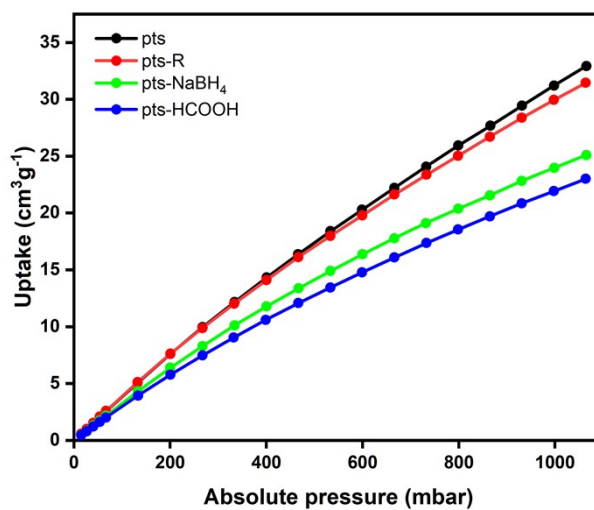

**Figure S4.** CO<sub>2</sub> adsorption isotherms of pts, pts-R<sub>HEH</sub>, pts-R<sub>NaBH<sub>4</sub></sub>, and pts-R<sub>HCOOH</sub> COF at room temperature.

## SUPPORTING INFORMATION

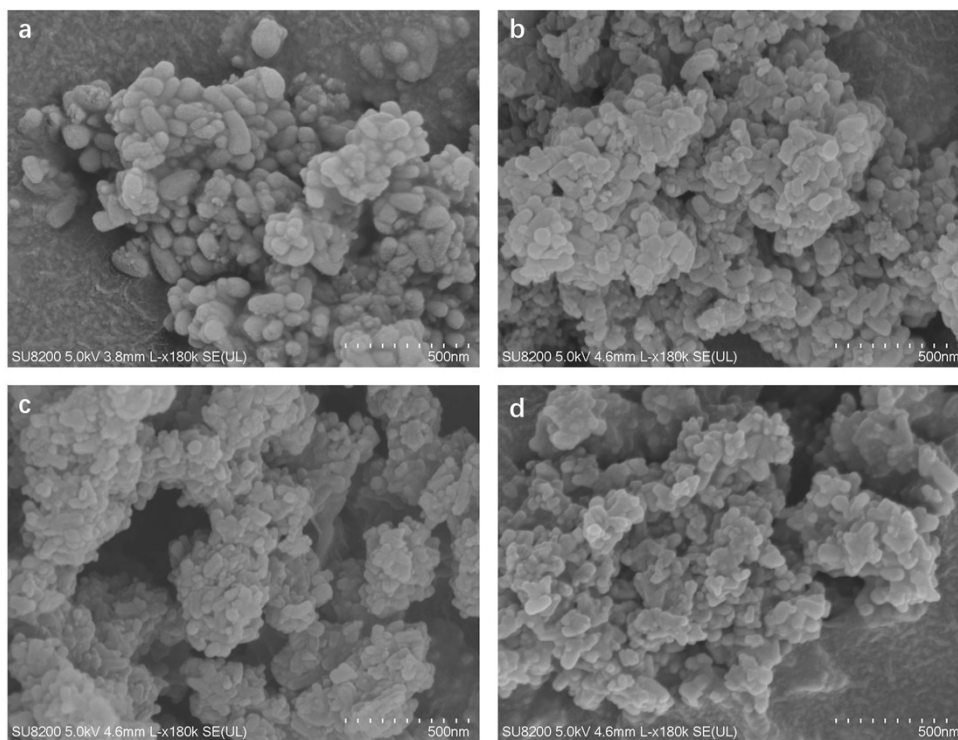

**Figure S5.** SEM image of (a) pts, (b) pts-R<sub>HEH</sub>, (c) pts-R<sub>HCOOH</sub>, (d) pts-R<sub>NaBH<sub>4</sub></sub>

**Table S1.** Comparison of different reduction methods for pts COF.

| Reductant                        | HEH      | NaBH <sub>4</sub> | HCOOH                                |
|----------------------------------|----------|-------------------|--------------------------------------|
| Process                          | One-pot  | Two-step          | Two-step<br>(metal removal required) |
| Loading (relative to imine)      | 3 equiv. | 8 equiv.          | 10 equiv.                            |
| Yield                            | 68%      | 65%               | 60%                                  |
| Chemo-selectivity                | Good     | Poor              | Poor                                 |
| Cost (per gram COF) <sup>a</sup> | 1.87 CNY | 7.55 CNY          | 0.17 CNY                             |
| Atom economy                     | Low      | Moderate          | Moderate                             |

<sup>a</sup> The prices of the reagents are taken from the website of Aladdin as of April 2026.

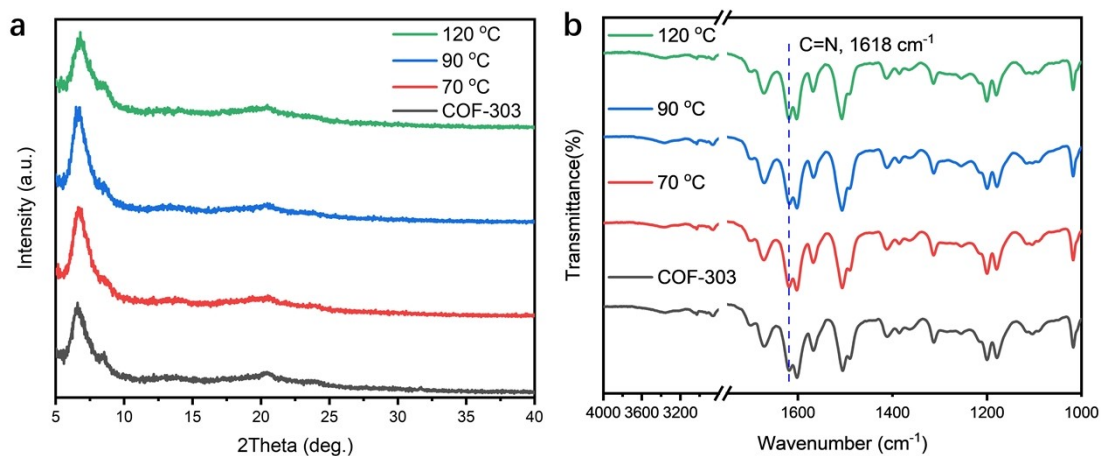

**Figure S6.** PXRD patterns (a) and FT-IR spectra (b) of COF-303 before and after reaction with Hantzsch ester at different temperatures.

## SUPPORTING INFORMATION

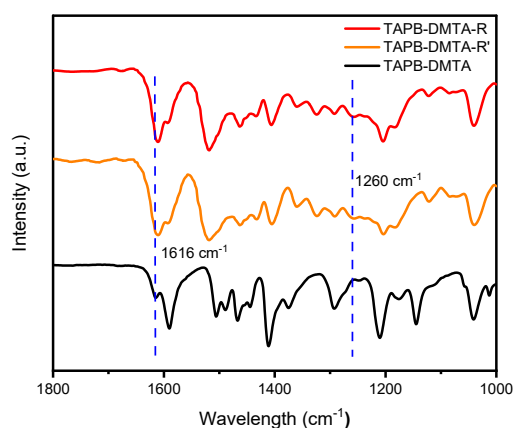

**Figure S7.** FT-IR spectra of TAPB-DMTA, TAPB-DMTA-R' (partial reduction), and TAPB-DMTA-R prepared using AcOH as the catalyst.

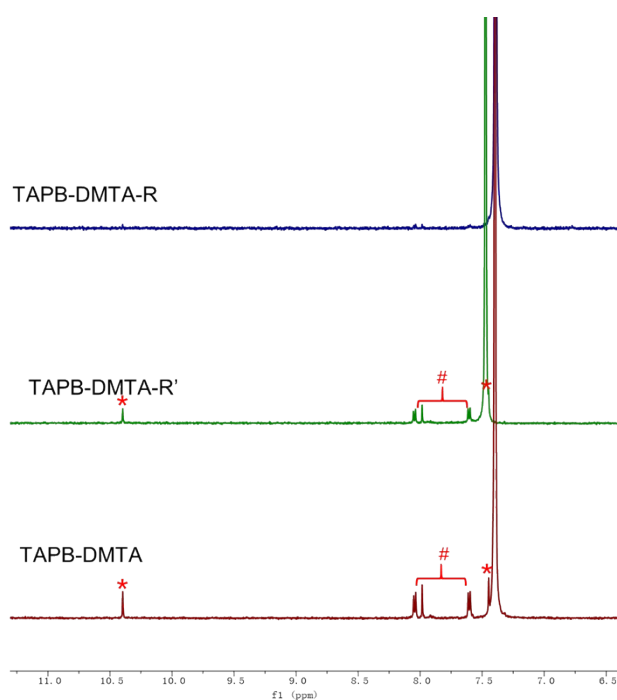

**Figure S8.** <sup>1</sup>H NMR spectra of acid-digested TAPB-DMTA, TAPB-DMTA-R', and TAPB-DMTA-R. \* and # denote the characteristic peaks of DMTA and TAPB, respectively.

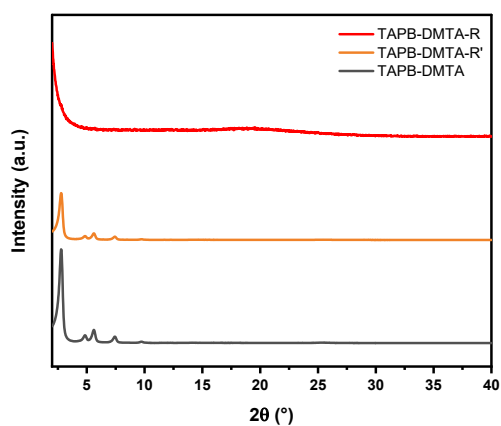

**Figure S9.** PXRD patterns of TAPB-DMTA, TAPB-DMTA-R' (partial reduction), and TAPB-DMTA-R prepared using AcOH as the catalyst.

## SUPPORTING INFORMATION

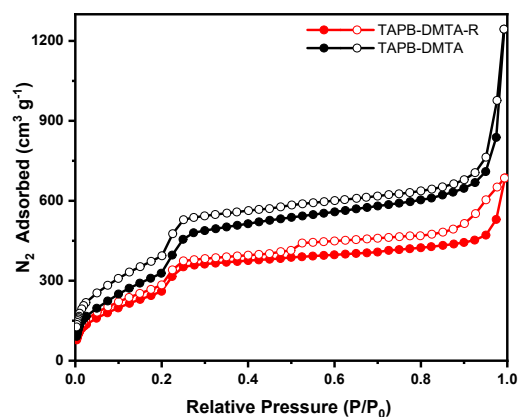

**Figure S10.** N<sub>2</sub> isotherms of TAPB-DMTA and TAPB-DMTA-R.

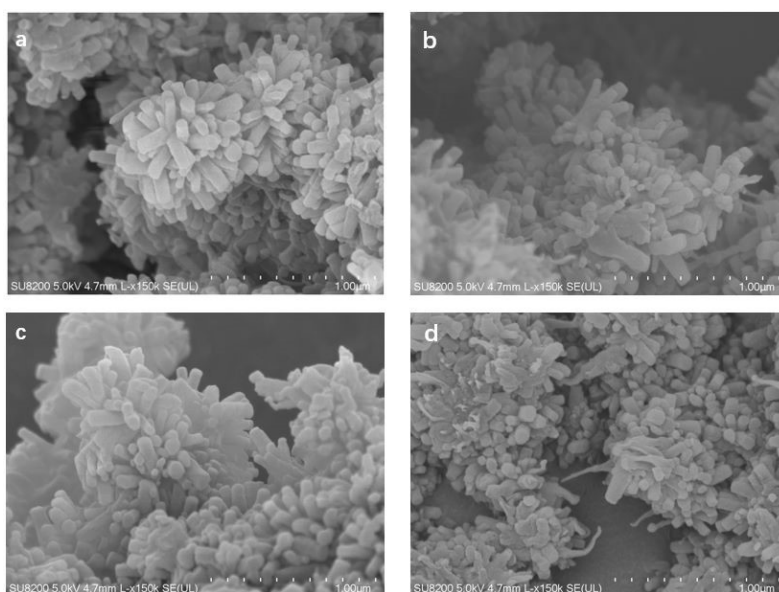

**Figure S11.** SEM images of TAPB-DMTA COF catalyzed by (a) AcOH, (b) Sc(OTf)<sub>3</sub>, (c) Fe(NO<sub>3</sub>)<sub>3</sub>·9H<sub>2</sub>O, (d) SbI<sub>3</sub>, respectively.

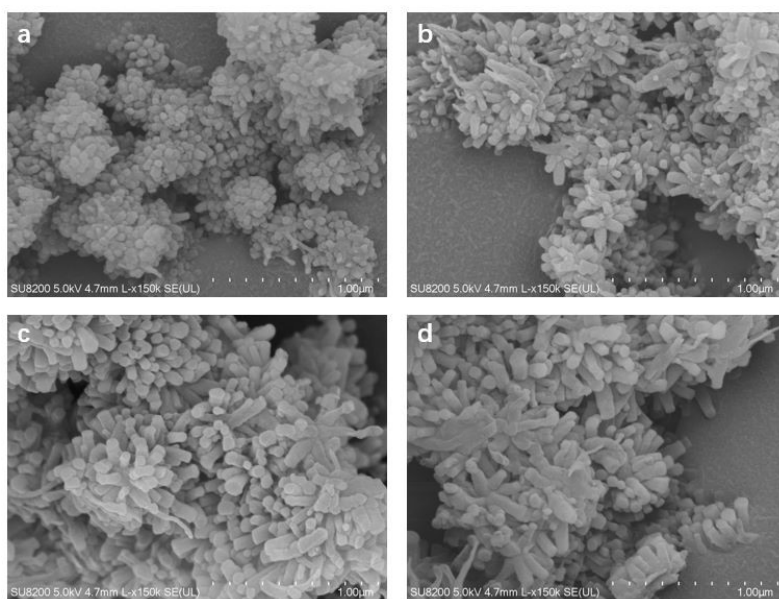

**Figure S12.** SEM images of TAPB-DMTA-R COF synthesized and modified by (a) AcOH, (b) Sc(OTf)<sub>3</sub>, (c) Fe(NO<sub>3</sub>)<sub>3</sub>·9H<sub>2</sub>O, and (d) SbI<sub>3</sub>, respectively.

## SUPPORTING INFORMATION

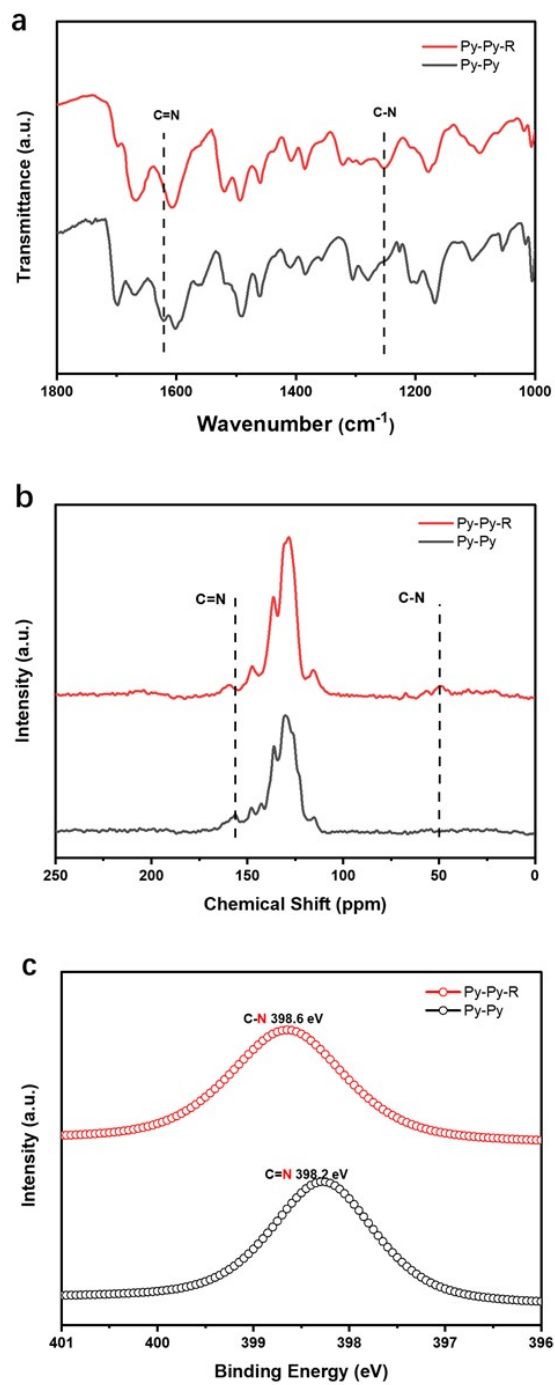

**Figure S13.** Comparison of a) FT-IR, b) solid state  $^{13}\text{C}$  NMR, and c) XPS N 1s spectra of Py-Py and Py-Py-R.

## SUPPORTING INFORMATION

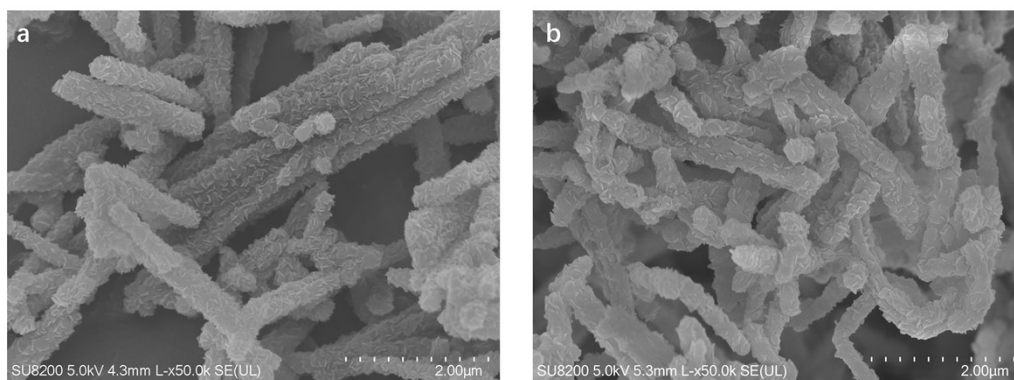

**Figure S14.** SEM image of (a) Py-Py and (b) Py-Py-R

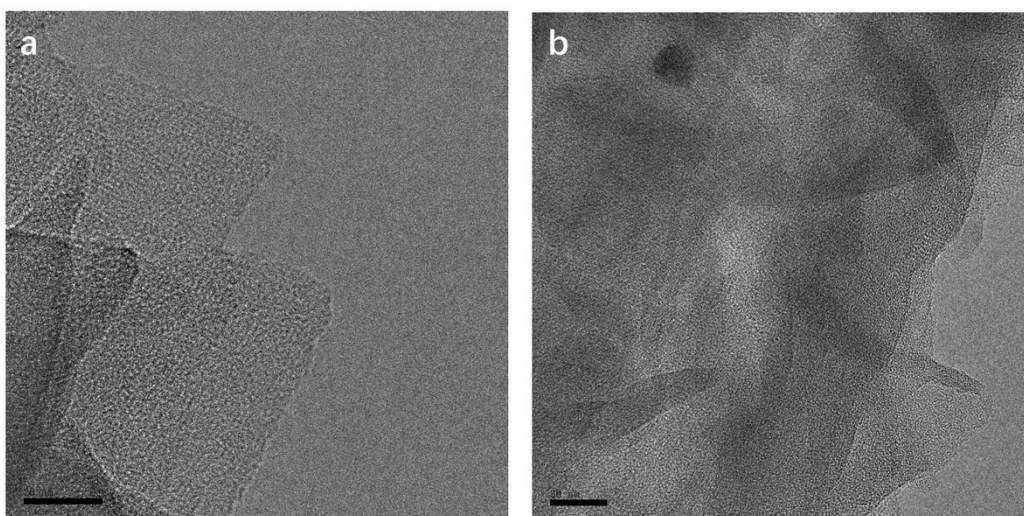

**Figure S15.** TEM image of (a) Py-Py and (b) Py-Py-R.

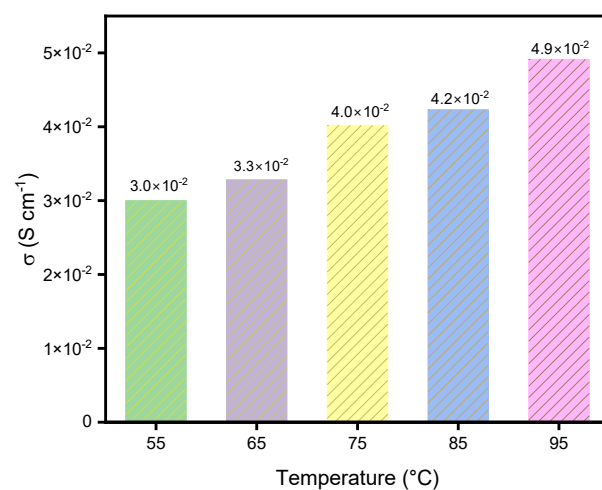

**Figure S16.** Proton conductivity of  $\text{H}_3\text{PO}_4@$ Py-Py-R at different temperatures (85 RH%)

## SUPPORTING INFORMATION

**Table S2.** Comparison of proton conductivities of reported H<sub>3</sub>PO<sub>4</sub>-loaded COF materials.

| Material   | H <sub>3</sub> PO <sub>4</sub><br>(wt%) | RH<br>(%) | T (°C) | $\sigma$<br>(S cm <sup>-1</sup> ) | E <sub>a</sub><br>(eV) | References                                                   |
|------------|-----------------------------------------|-----------|--------|-----------------------------------|------------------------|--------------------------------------------------------------|
| Py-Py-R    | 100.0                                   | 80        | 95     | 4.90×10 <sup>-2</sup>             | 0.16                   | This work                                                    |
| Tp-Azo     | 5.7                                     | 98        | 25     | 9.90×10 <sup>-4</sup>             | 0.11                   | <i>J. Am. Chem. Soc.</i> <b>2014</b> ,<br>136, 6570.         |
| TpBpy-MC   | 12.4                                    | -         | 120    | 2.50×10 <sup>-3</sup>             | 0.11                   | <i>J. Mater. Chem. A</i> <b>2016</b> ,<br>4, 2682.           |
| TpBpy-ST   | 17.7                                    | -         | 120    | 1.98×10 <sup>-3</sup>             | 0.12                   |                                                              |
| Aza-COF-1  | 3.8                                     | 97        | 50     | 1.23×10 <sup>-3</sup>             | 0.29                   | <i>Chem. Mater.</i> <b>2019</b> , 31,<br>819.                |
| Aza-COF-2  | 4.8                                     | 97        | 50     | 4.80×10 <sup>-3</sup>             | 0.45                   |                                                              |
| EB-COF     | 56.5                                    | -         | 180    | 2.77×10 <sup>-2</sup>             | 0.35                   | <i>J. Mater. Chem. A</i> , <b>2020</b> ,<br>8, 13702         |
| COF-F6-H   | 62.0                                    | -         | 140    | 4.20×10 <sup>-2</sup>             | 0.09                   | <i>J. Am. Chem. Soc.</i><br><b>2020</b> , 142, 14357.        |
| NKCOF-1    | 8.8                                     | 98        | 80     | 1.13×10 <sup>-1</sup>             | 0.14                   | <i>Angew. Chem. Int. Ed.</i><br><b>2020</b> , 59, 3678.      |
| NKCOF-2    | 2.0                                     | 98        | 80     | 4.28×10 <sup>-2</sup>             | 0.24                   |                                                              |
| NKCOF-3    | 4.9                                     | 98        | 80     | 1.12×10 <sup>-2</sup>             | 0.40                   |                                                              |
| NKCOF-4    | 4.2                                     | 98        | 80     | 7.71×10 <sup>-2</sup>             | 0.08                   |                                                              |
| TPB-DMeTP  | 266.6                                   | -         | 160    | 1.91×10 <sup>-1</sup>             | 0.34                   | <i>Nat. Commun.</i> <b>2020</b> , 11,<br>1981                |
| TPB-DABI   | 66.1                                    | -         | 160    | 1.52×10 <sup>-1</sup>             | 0.17                   | <i>Angew. Chem. Int. Ed.</i><br><b>2021</b> , 60, 12918.     |
| NKCOF-10   | 31.0                                    | 90        | 25     | 6.97×10 <sup>-2</sup>             | 0.06                   | <i>Nat. Commun.</i> <b>2021</b> , 12,<br>1982.               |
| NKCOF-54   | 131.1                                   | -         | 160    | 2.33×10 <sup>-2</sup>             | 0.29                   | <i>Angew. Chem. Int. Ed.</i><br><b>2023</b> , 62, e202217240 |
| TPB-DMeTP  | 292.8                                   | -         | 160    | 3.06×10 <sup>-1</sup>             | 0.27                   | <i>J. Am. Chem. Soc.</i><br><b>2024</b> , 146, 18151.        |
| TPB-TMBPDA | 239.7                                   | -         | 160    | 4.29×10 <sup>-2</sup>             | 0.20                   |                                                              |
| TTA-TFPB   | 170.2                                   | -         | 160    | 1.12×10 <sup>-2</sup>             | 0.46                   |                                                              |
| TTA-TFB    | 111.6                                   | -         | 160    | 1.97×10 <sup>-3</sup>             | 0.57                   |                                                              |
| ACOF-1     | 75.0                                    | -         | 160    | 6.82×10 <sup>-5</sup>             | 0.75                   |                                                              |
| USTB-5o    | 231.0                                   | -         | 140    | 6.30×10 <sup>-2</sup>             | 0.20                   | <i>Nat. Chem.</i> <b>2024</b> , 16,<br>114.                  |

## SUPPORTING INFORMATION

### 6. References

- [1] C. Gao, J. Li, S. Yin, J. L. Sun, C. Wang, *Journal of the American Chemical Society* **2020**, *142*, 3718-3723.
- [2] X. Xu, P. Cai, H. Chen, H.-C. Zhou, N. Huang, *J. Am. Chem. Soc.* **2022**, *144*, 18511-18517.
- [3] L. Chen, C. Gong, X. Wang, F. Dai, M. Huang, X. Wu, C.-Z. Lu, Y. Peng, *J. Am. Chem. Soc.* **2021**, *143*, 10243-10249.
- [4] C. H. Feriante, S. Jhulki, A. M. Evans, R. R. Dasari, K. Slicker, W. R. Dichtel, S. R. Marder, *Adv. Mater.* **2020**, *32*, 1905776.
- [5] L. Yao, A. Rodríguez-Camargo, M. Xia, D. Mücke, R. Guntermann, Y. Liu, L. Grunenberg, A. Jiménez-Solano, S. T. Emmerling, V. Duppel, K. Sivula, T. Bein, H. Qi, U. Kaiser, M. Grätzel, B. V. Lotsch, *J. Am. Chem. Soc.* **2022**, *144*, 10291-10300.
- [6] D. Zhu, Z. Zhang, L. B. Alemany, Y. Li, N. Nnorom, M. Barnes, S. Khalil, M. M. Rahman, P. M. Ajayan, R. Verduzco, *Chem. Mater.* **2021**, *33*, 3394-3400.
- [7] Y. Liu, Y. Zhu, S. B. Alahakoon, E. Egap, *ACS Materials Lett.* **2020**, *2*, 1561-1566.
- [8] Q. Yan, H. Xu, X. Jing, H. Hu, S. Wang, C. Zeng, Y. Gao, *RSC Adv.* **2020**, *10*, 17396-17403.
